# Supplementary material for: Activation of the sympathetic nervous system modulates neutrophil function
Source: PubMed Central journal article supplement — J Leukoc Biol. 2017 Dec 21;103(2):295–309. doi: 10.1002/JLB.3MA0517-194RR (PMC6635748; doi:10.1002/jlb.3ma0517-194rr), 2017-12-21
Supplement: JLB-103-295-s001.pdf [file JLB-103-295-s001.pdf]

# **Activation of the sympathetic nervous system modulates neutrophil function**

Alyce J. Nicholls, Shu Wen Wen, Pam Hall, Michael J. Hickey and Connie H. Y. Wong\*

Affiliations: Centre for Inflammatory Diseases, Department of Medicine, School of Clinical Sciences at Monash Health, Monash University, Australia.

\* Address correspondence to Connie H. Y. Wong, [connie.wong@monash.edu](mailto:connie.wong@monash.edu)

Centre for Inflammatory Diseases,  
Department of Medicine, School of Clinical Sciences,  
Monash Medical Centre,  
Monash University,  
Victoria, Australia.

**SUPPLEMENTAL FIGURES**

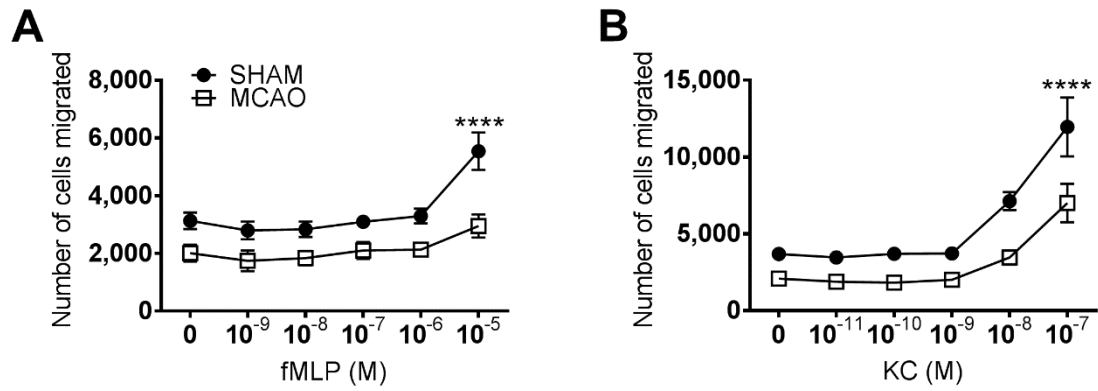

**Supplemental Figure 1:** Bone marrow neutrophils isolated from mice that underwent sham surgery or 60 mins MCAO at 4 h were assessed for migratory activity towards fMLP (**A**) and KC (**B**). Data represent mean  $\pm$  SEM;  $N \geq 3$  individual mice per group; \*\*\*\* $P < 0.0001$  for Sham compared with MCAO, two-way ANOVA with Tukey's multiple comparisons test. MCAO: Mid-cerebral artery occlusion.

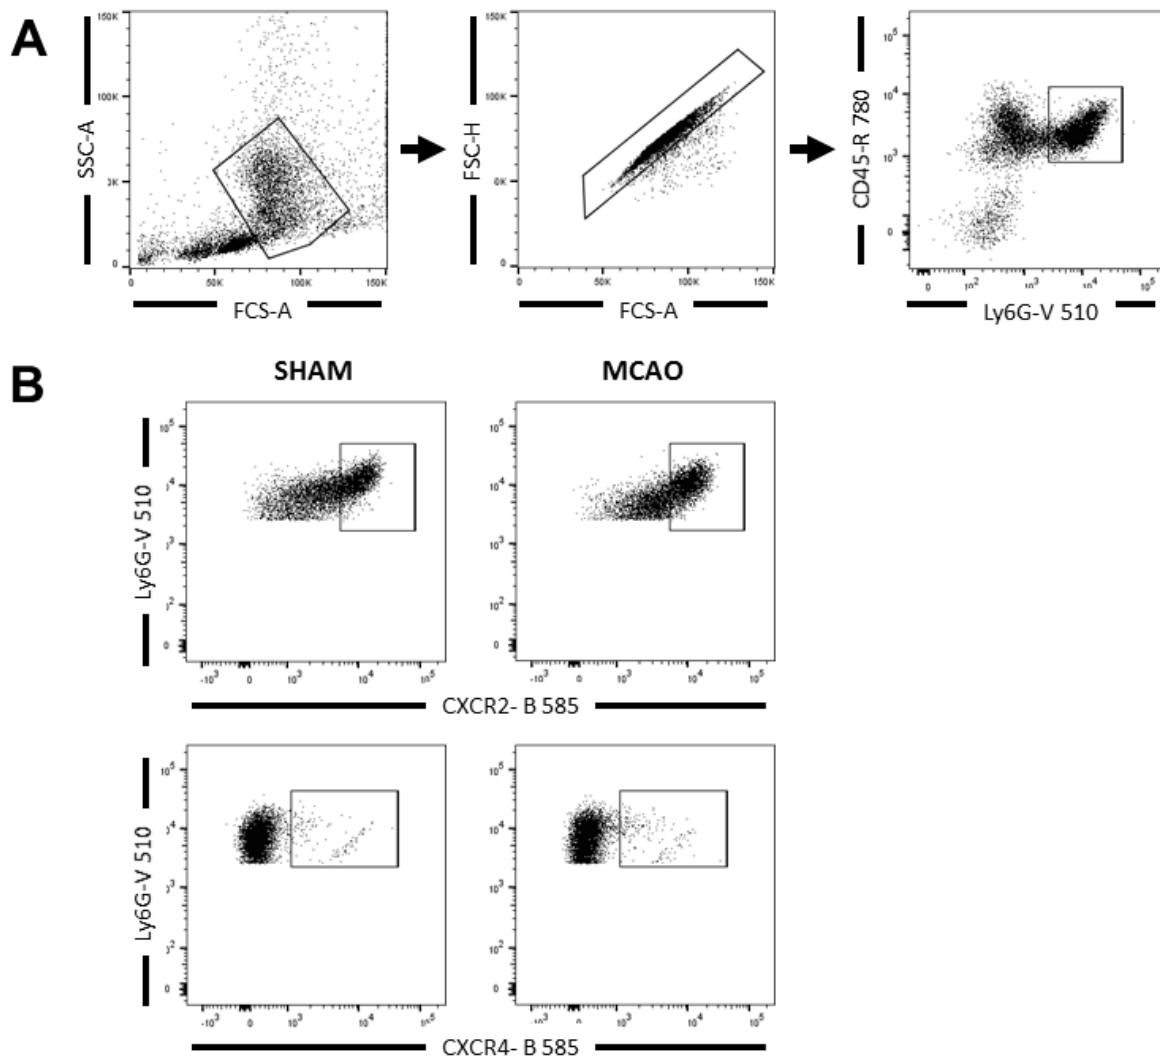

**Supplemental Figure 2:** The gating strategy for examining the neutrophil population in the bone marrow (**A**); and the CXCR2 and CXCR4 surface expression on bone marrow neutrophils at 24 h after sham or MCAO surgery (**B**). The same gating strategy was used to assess these chemokine receptor expression for neutrophils in the circulating blood.

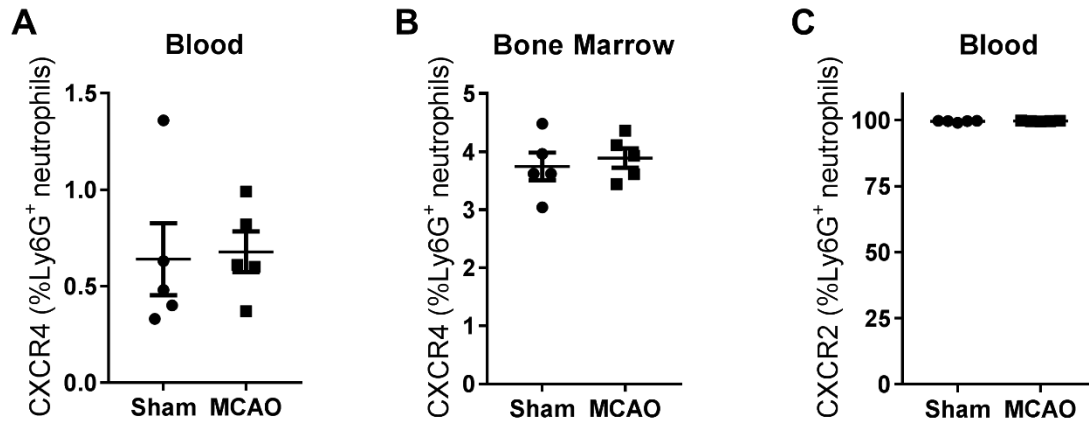

**Supplemental Figure 3:** Cell surface expression of CXCR4 on Ly6G<sup>+</sup> neutrophils isolated from blood (**A**) and bone marrow (**B**) of sham-operated and MCAO-operated mice. Cell surface expression of CXCR2 on Ly6G<sup>+</sup> neutrophils isolated from blood (**C**) of sham-operated and MCAO-operated mice. N ≥ 5 individual mice per group. Data represent mean ± SEM. MCAO: Mid-cerebral artery occlusion.

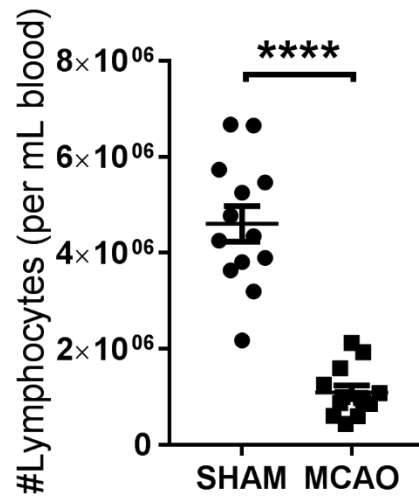

**Supplemental Figure 4:** The number of lymphocytes from the blood of sham-operated and MCAO-operated mice at 24 h.  $N \geq 12$  individual mice per group. Data represent mean  $\pm$  SEM. \*\*\*\* $P < 0.0001$ ,  $t$ -test. MCAO: Mid-cerebral artery occlusion.
